# Supplementary material for: XPC Protects against Carcinogen-Induced Histologic Progression to Lung Squamous Cell Carcinoma by Reduced Basal Epithelial Cell Proliferation
Source: MDPI journal article supplement (doi:10.3390/cancers16081495), 2024-04-13
Supplement: s1 [file s1]

## Supplemental Materials

### Supplemental Tables and Figures

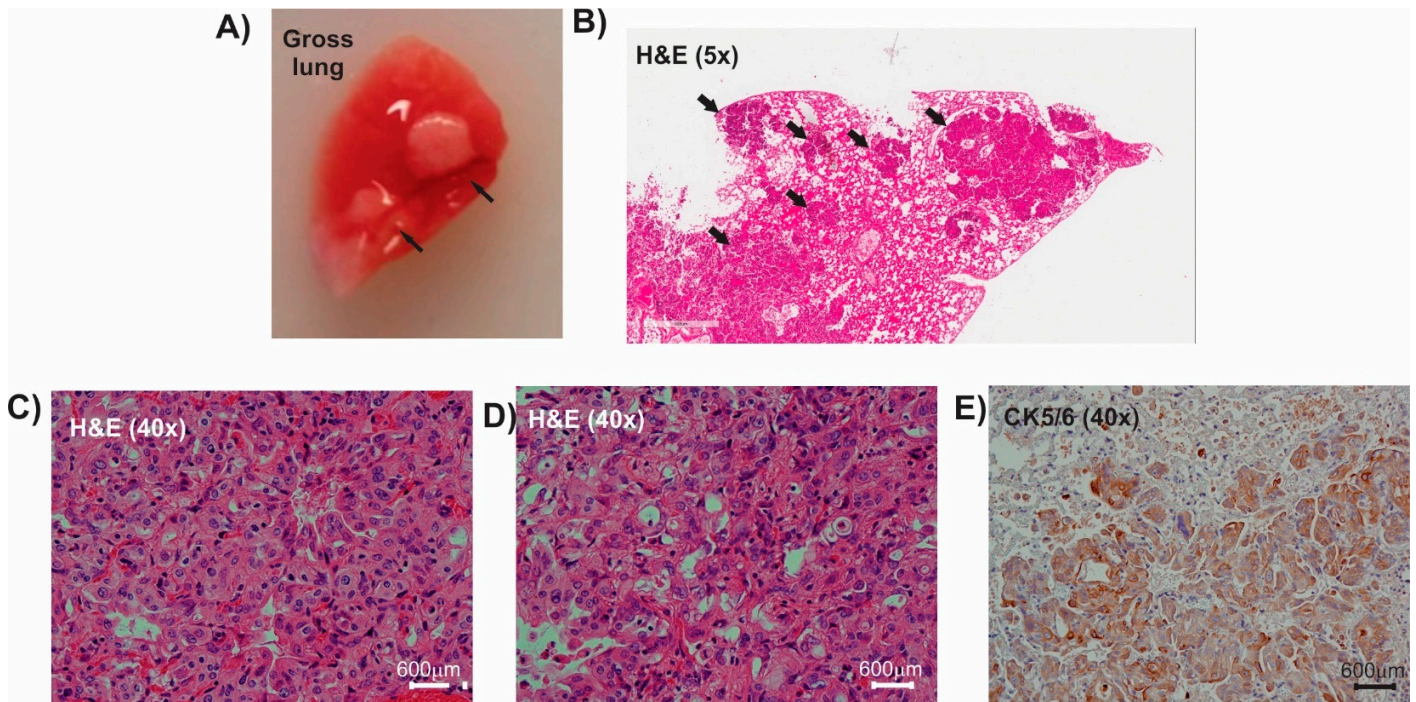

**Figure S1: Characteristic findings of the NTCU lung squamous cell (LUSC) model** A) Representative gross image of LUSC on a mouse lung surface. B) Characterization of LUSC by H&E stain at low (B) and high (C and D) magnifications. E) Characteristic positive CK 5/6 staining by immunohistochemistry. NTCU, N-nitroso-tris-chloroethylurea. LUSC, lung squamous cell carcinoma. CK5/6, cytokeratin 5/6. H&E, hematoxylin-eosin.

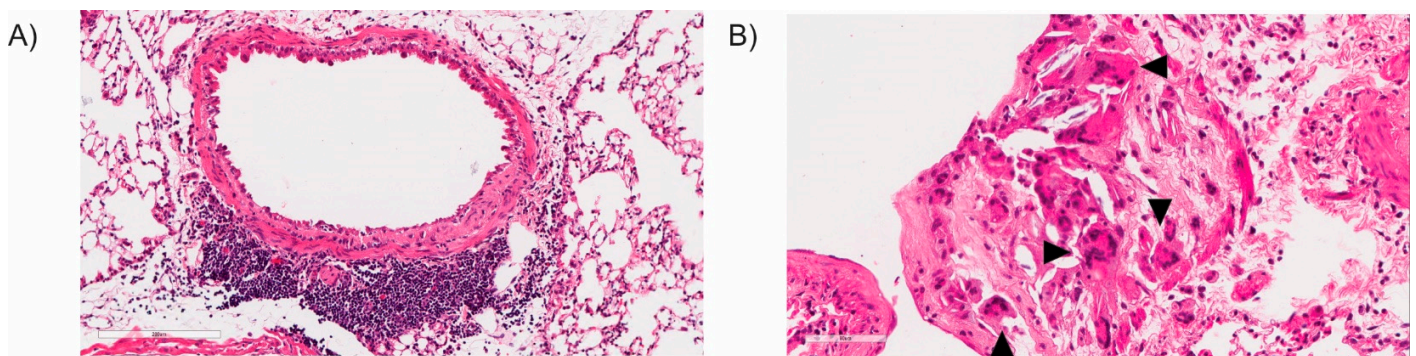

**Figure S2: Images characteristic of lymphomatous and granulomatous lung changes.** A) Lymphoid aggregates surrounding the airway. 20x magnification. B) Poorly formed granuloma with numerous giant cells (arrow heads). 30x magnification.

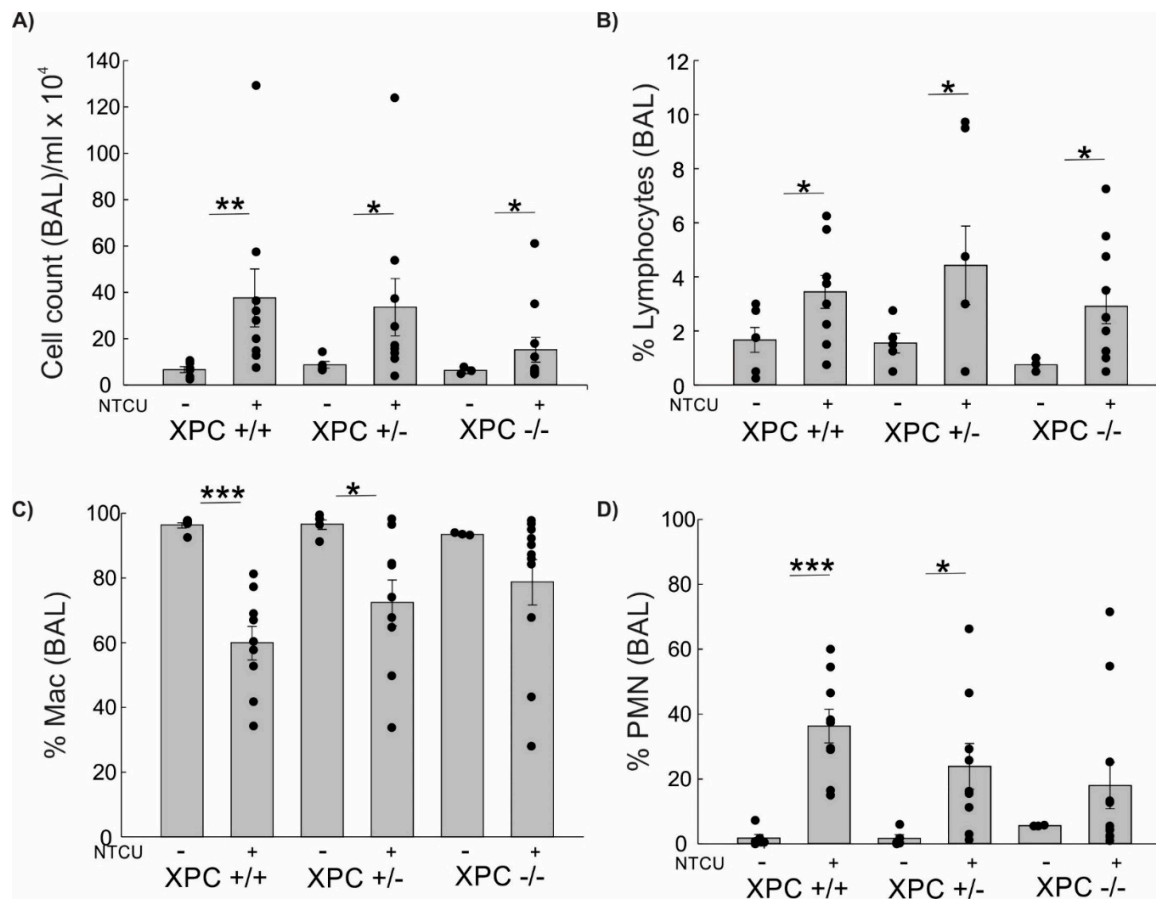

**Figure S3: Bronchoalveolar lavage (BAL) cellular component by NTCU treatment and XPC expression** A) Absolute cell count per ml BAL collected. B) Percent lymphocytes in BAL. C) % macrophages in BAL. D) % polymorphonuclear cells in BAL. \* $p < 0.05$ , \*\* $p < 0.01$ , \*\*\* $p < 0.001$  by ANOVA with intergroup comparisons.

**Supplemental Table. Progression of Histology by Weeks of NTCU Treatment.**

| Weeks (NTCU) | Highest Histologic Grade | Mice (total) by Genotype |         | p-value* |
|--------------|--------------------------|--------------------------|---------|----------|
|              |                          | XPC +/+                  | XPC -/- |          |
| 8 weeks      |                          |                          |         | p=0.036  |
|              | Atypia/Metaplasia        | 4                        | 0       |          |
|              | Low-Grade Dysplasia      | 2                        | 4       |          |
|              | High-Grade Dysplasia     | 0                        | 2       |          |
|              | Squamous Cell Carcinoma  | 0                        | 0       |          |
| 10 weeks     |                          |                          |         | p=0.343  |
|              | Atypia/Metaplasia        | 1                        | 0       |          |
|              | Low-Grade Dysplasia      | 4                        | 3       |          |
|              | High-Grade Dysplasia     | 1                        | 3       |          |
|              | Squamous Cell Carcinoma  | 0                        | 0       |          |
| 12 weeks     |                          |                          |         | p=0.034  |
|              | Atypia/Metaplasia        | 1                        | 0       |          |
|              | Low-Grade Dysplasia      | 4                        | 0       |          |
|              | High-Grade Dysplasia     | 2                        | 4       |          |
|              | Squamous Cell Carcinoma  | 0                        | 3       |          |
| 16 weeks     |                          |                          |         | p=0.039  |
|              | Atypia/Metaplasia        | 0                        | 0       |          |
|              | Low-Grade Dysplasia      | 4                        | 0       |          |
|              | High-Grade Dysplasia     | 3                        | 5       |          |
|              | Squamous Cell Carcinoma  | 0                        | 2       |          |

\*Statistical difference in highest histologic grade by XPC genotype ( $p < 0.001$  overall by Fisher's Exact test, shown individually by genotype by weeks of NTCU treatment).
